# Supplementary material for: A decrease in reports on road-killed animals based on citizen science during COVID-19 lockdown
Source: PeerJ. 2021 Nov 23;9:e12464. doi: 10.7717/peerj.12464 (PMC8621783; doi:10.7717/peerj.12464)
Supplement: Supplemental Information 2 [file peerj-09-12464-s002.xlsx]

## Sheet: Tabelle1
Antwort_ID	Zufallsgeneratorstartwert	duration	number_rk	length_change	length_red_inc	howmuchlength_red	howmuchlength_inc	frequ_change	frequ_red_inc	howmuchfrequ_red	howmuchfrequ_inc	routechange	route_from	route_to	roadchange	road_from	road_to	transportchange	transport_from	transport_to
3	7135390	Ja	Ich habe gefühlt weniger Roadkills gemeldet.	Ja	Reduziert	76-100%		Ja	Reduziert	76-100%		Nein			Ja	Überlandstraßen (zwischen Gemeinden, Geschwindigkeitsbegrenzung 70-100km/h)	Forststraße oder Feldweg (nicht asphaltiert, außerhalb von Ortgebieten)	Ja	PKW	zu Fuß
4	7792	Ja	Ich habe gefühlt weniger Roadkills gemeldet.	Nein				Nein				Nein			Nein			Nein
5	4301191	Ja	Ich habe gefühlt weniger Roadkills gemeldet.	Ja	Reduziert	51-75%		Ja	Reduziert	26-50%		Ja	besiedeltes Gebiet (z.B. Dörfer, Städte)	landwirtschaftlich genutztes Gebiet (z.B. Felder, Äcker, Obst- bzw. Weinbaugebiete)	Nein			Nein
6	499387	Ja	Ich habe gefühlt weniger Roadkills gemeldet.	Ja	Reduziert	76-100%		Ja	Reduziert	76-100%		Ja	besiedeltes Gebiet (z.B. Dörfer, Städte)	landwirtschaftlich genutztes Gebiet (z.B. Felder, Äcker, Obst- bzw. Weinbaugebiete)	Ja	Überlandstraßen (zwischen Gemeinden, Geschwindigkeitsbegrenzung 70-100km/h)	innerorts (im Ortsgebiet, Geschwindigkeitsbegrenzung bis 50km/h)	Ja	PKW	zu Fuß
7	5653572	Ja	Ich habe gefühlt weniger Roadkills gemeldet.	Ja	Reduziert	51-75%		Ja	Reduziert	51-75%		Nein			Nein			Nein
8	6861693	Ja	Ich habe gefühlt gleich viele Roadkills gemeldet.	Nein				Nein				Nein			Nein			Nein
9	7347747	Ja	Ich habe gefühlt weniger Roadkills gemeldet.	Ja	Reduziert	26-50%		Ja	Reduziert	26-50%		Nein			Nein			Nein
10	6153656	Ja	Ich habe gefühlt mehr Roadkills gemeldet.	Nein				Ja	Erhöht		76-100%	Nein			Nein			Nein
11	8725041	Ja	Ich habe gefühlt gleich viele Roadkills gemeldet.	Ja	Erhöht		mehr als 100%	Ja	Reduziert	26-50%		Nein			Ja	innerorts (im Ortsgebiet, Geschwindigkeitsbegrenzung bis 50km/h)	Forststraße oder Feldweg (nicht asphaltiert, außerhalb von Ortgebieten)	Ja	anders (z.B. öffentliche Verkehrsmittel)	zu Fuß
12	5164239	Nein	Ich habe gefühlt weniger Roadkills gemeldet.	Ja	Reduziert	0-25%		Ja	Reduziert	0-25%		Nein			Nein			Nein
14	2737630	Ja	Ich habe gefühlt weniger Roadkills gemeldet.	Nein				Ja	Reduziert	76-100%		Nein			Nein			Ja	Fahrrad	PKW
15	4749941	Ja	Ich habe gefühlt weniger Roadkills gemeldet.	Ja	Reduziert	0-25%		Ja	Reduziert	76-100%		Nein			Nein			Ja	anders (z.B. öffentliche Verkehrsmittel)	PKW
16	5536818	Ja	Ich habe gefühlt weniger Roadkills gemeldet.	Ja	Reduziert	51-75%		Ja	Reduziert	51-75%		Ja	landwirtschaftlich genutztes Gebiet (z.B. Felder, Äcker, Obst- bzw. Weinbaugebiete)	besiedeltes Gebiet (z.B. Dörfer, Städte)	Nein			Nein
17	3434266	Ja	Ich habe gefühlt weniger Roadkills gemeldet.	Ja	Reduziert	76-100%		Ja	Reduziert	76-100%		Ja	besiedeltes Gebiet (z.B. Dörfer, Städte)	landwirtschaftlich genutztes Gebiet (z.B. Felder, Äcker, Obst- bzw. Weinbaugebiete)	Ja	Schnellstraßen/Autobahnen (mehrspurig, Geschwindigkeitsbegrenzung >100km/h)	Forststraße oder Feldweg (nicht asphaltiert, außerhalb von Ortgebieten)	Ja	PKW	zu Fuß
19	2501591	Ja	Ich habe gefühlt gleich viele Roadkills gemeldet.	Nein				Nein				Nein			Nein			Nein
20	825322	Ja	Ich habe gefühlt weniger Roadkills gemeldet.	Nein				Nein				Nein			Nein			Nein
21	6621836	Ja	Ich habe gefühlt mehr Roadkills gemeldet.	Ja	Erhöht		26-50%	Ja	Erhöht		26-50%	Nein			Nein			Nein
22	633217	Nein	Ich habe gefühlt gleich viele Roadkills gemeldet.	Ja	Reduziert	0-25%		Ja	Reduziert	0-25%		Ja	besiedeltes Gebiet (z.B. Dörfer, Städte)	landwirtschaftlich genutztes Gebiet (z.B. Felder, Äcker, Obst- bzw. Weinbaugebiete)	Ja	innerorts (im Ortsgebiet, Geschwindigkeitsbegrenzung bis 50km/h)	Schnellstraßen/Autobahnen (mehrspurig, Geschwindigkeitsbegrenzung >100km/h)	Ja	zu Fuß	PKW
23	3300576	Ja	Ich habe gefühlt gleich viele Roadkills gemeldet.	Ja	Reduziert	26-50%		Ja	Reduziert	26-50%		Ja	landwirtschaftlich genutztes Gebiet (z.B. Felder, Äcker, Obst- bzw. Weinbaugebiete)	besiedeltes Gebiet (z.B. Dörfer, Städte)	Ja	Forststraße oder Feldweg (nicht asphaltiert, außerhalb von Ortgebieten)	innerorts (im Ortsgebiet, Geschwindigkeitsbegrenzung bis 50km/h)	Nein
24	4603228	Ja	Ich habe gefühlt weniger Roadkills gemeldet.	Nein				Nein				Nein			Nein			Nein
25	3114413	Nein	Ich habe gefühlt gleich viele Roadkills gemeldet.	Nein				Ja	Reduziert	51-75%		Nein			Nein			Nein
26	1762383	Ja	Ich habe gefühlt weniger Roadkills gemeldet.	Ja	Reduziert	26-50%		Ja	Reduziert	51-75%		Ja	landwirtschaftlich genutztes Gebiet (z.B. Felder, Äcker, Obst- bzw. Weinbaugebiete)	besiedeltes Gebiet (z.B. Dörfer, Städte)	Nein			Nein
27	9468674	Ja	Ich habe gefühlt weniger Roadkills gemeldet.	Ja	Reduziert	51-75%		Ja	Reduziert	26-50%		Nein			Nein			Nein
28	2056223	Nein	Ich habe gefühlt mehr Roadkills gemeldet.	Nein				Ja	Erhöht		51-75%	Nein			Nein			Nein
29	1875094	Ja	Ich habe gefühlt gleich viele Roadkills gemeldet.	Nein				Ja	Reduziert	51-75%		Nein			Nein			Nein
30	3206801	Ja	Ich habe gefühlt weniger Roadkills gemeldet.	Ja	Reduziert	76-100%		Ja	Reduziert	76-100%		Nein			Nein			Nein
31	408721	Ja	Ich habe gefühlt gleich viele Roadkills gemeldet.	Ja	Reduziert	76-100%		Ja	Reduziert	76-100%		Nein			Nein			Ja	anders (z.B. öffentliche Verkehrsmittel)	PKW
32	2423203	Ja	Ich habe gefühlt weniger Roadkills gemeldet.	Ja	Reduziert	26-50%		Ja	Reduziert	26-50%		Ja	landwirtschaftlich genutztes Gebiet (z.B. Felder, Äcker, Obst- bzw. Weinbaugebiete)	besiedeltes Gebiet (z.B. Dörfer, Städte)	Ja	Schnellstraßen/Autobahnen (mehrspurig, Geschwindigkeitsbegrenzung >100km/h)	innerorts (im Ortsgebiet, Geschwindigkeitsbegrenzung bis 50km/h)	Ja	PKW	zu Fuß
34	7179658	Ja	Ich habe gefühlt weniger Roadkills gemeldet.	Ja	Reduziert	76-100%		Ja	Reduziert	76-100%		Ja	besiedeltes Gebiet (z.B. Dörfer, Städte)	forstwirtschaftlich genutztes Gebiet (z.B. Wälder)	Ja	innerorts (im Ortsgebiet, Geschwindigkeitsbegrenzung bis 50km/h)	Forststraße oder Feldweg (nicht asphaltiert, außerhalb von Ortgebieten)	Ja	anders (z.B. öffentliche Verkehrsmittel)	zu Fuß
35	3228729	Ja	Ich habe gefühlt weniger Roadkills gemeldet.	Nein				Ja	Reduziert	26-50%		Nein			Nein			Nein
36	4604670	Ja	Ich habe gefühlt weniger Roadkills gemeldet.	Nein				Nein				Nein			Nein			Nein
38	2871823	Ja	Ich habe gefühlt weniger Roadkills gemeldet.	Nein				Ja	Reduziert	26-50%		Nein			Nein			Nein
39	4347613	Ja	Ich habe gefühlt weniger Roadkills gemeldet.	Nein				Nein				Ja	forstwirtschaftlich genutztes Gebiet (z.B. Wälder)	landwirtschaftlich genutztes Gebiet (z.B. Felder, Äcker, Obst- bzw. Weinbaugebiete)	Nein			Nein
42	3482971	Ja	Ich habe gefühlt gleich viele Roadkills gemeldet.	Ja	Reduziert	76-100%		Ja	Reduziert	76-100%		Ja	besiedeltes Gebiet (z.B. Dörfer, Städte)	landwirtschaftlich genutztes Gebiet (z.B. Felder, Äcker, Obst- bzw. Weinbaugebiete)	Ja	Überlandstraßen (zwischen Gemeinden, Geschwindigkeitsbegrenzung 70-100km/h)	Forststraße oder Feldweg (nicht asphaltiert, außerhalb von Ortgebieten)	Ja	PKW	Fahrrad
43	9704396	Nein	Ich habe gefühlt weniger Roadkills gemeldet.	Nein				Nein				Nein			Nein			Nein
44	8073068	Nein	Ich habe gefühlt weniger Roadkills gemeldet.	Nein				Ja	Reduziert	26-50%		Nein			Nein			Nein
47	6451329	Nein	Ich habe gefühlt weniger Roadkills gemeldet.	Ja	Reduziert	76-100%		Ja	Reduziert	76-100%		Ja	besiedeltes Gebiet (z.B. Dörfer, Städte)	forstwirtschaftlich genutztes Gebiet (z.B. Wälder)	Nein			Nein
49	6131974	Nein	Ich habe gefühlt gleich viele Roadkills gemeldet.	Ja	Reduziert	51-75%		Ja	Reduziert	51-75%		Ja	landwirtschaftlich genutztes Gebiet (z.B. Felder, Äcker, Obst- bzw. Weinbaugebiete)	besiedeltes Gebiet (z.B. Dörfer, Städte)	Ja	Überlandstraßen (zwischen Gemeinden, Geschwindigkeitsbegrenzung 70-100km/h)	innerorts (im Ortsgebiet, Geschwindigkeitsbegrenzung bis 50km/h)	Ja	PKW	Fahrrad
52	6749807	Nein	Ich habe gefühlt weniger Roadkills gemeldet.	Ja	Reduziert	76-100%		Ja	Reduziert	76-100%		Ja	landwirtschaftlich genutztes Gebiet (z.B. Felder, Äcker, Obst- bzw. Weinbaugebiete)	besiedeltes Gebiet (z.B. Dörfer, Städte)	Ja	Überlandstraßen (zwischen Gemeinden, Geschwindigkeitsbegrenzung 70-100km/h)	innerorts (im Ortsgebiet, Geschwindigkeitsbegrenzung bis 50km/h)	Ja	Fahrrad	zu Fuß
53	9348562	Nein	Ich habe gefühlt gleich viele Roadkills gemeldet.	Nein				Nein				Nein			Nein			Nein
54	6493390	Ja	Ich habe gefühlt gleich viele Roadkills gemeldet.	Ja	Reduziert	76-100%		Ja	Reduziert	76-100%		Nein			Nein			Nein
55	4421264	Ja	Ich habe gefühlt weniger Roadkills gemeldet.	Nein				Nein				Nein			Nein			Nein
56	2626150	Nein	Ich habe gefühlt gleich viele Roadkills gemeldet.	Ja	Reduziert	51-75%		Ja	Reduziert	51-75%		Nein			Nein			Ja	zu Fuß	Fahrrad
57	9866960	Ja	Ich habe gefühlt weniger Roadkills gemeldet.	Nein				Nein				Nein			Nein			Nein
58	1456350	Ja	Ich habe gefühlt gleich viele Roadkills gemeldet.	Nein				Ja	Erhöht		51-75%	Nein			Ja	Schnellstraßen/Autobahnen (mehrspurig, Geschwindigkeitsbegrenzung >100km/h)	Überlandstraßen (zwischen Gemeinden, Geschwindigkeitsbegrenzung 70-100km/h)	Ja	PKW	zu Fuß
59	2099806845	Ja	Ich habe gefühlt gleich viele Roadkills gemeldet.	Nein				Nein				Nein			Nein			Nein
60	993603403	Ja	Ich habe gefühlt gleich viele Roadkills gemeldet.	Ja	Erhöht		0-25%	Ja	Erhöht		0-25%	Nein			Nein			Nein
61	1406878745	Ja	Ich habe gefühlt weniger Roadkills gemeldet.	Ja	Reduziert	51-75%		Ja	Reduziert	76-100%		Nein			Nein			Nein
62	1647992404	Ja	Ich habe gefühlt gleich viele Roadkills gemeldet.	Nein				Nein				Nein			Nein			Nein
63	2043067186	Nein	Ich habe gefühlt gleich viele Roadkills gemeldet.	Ja	Erhöht		26-50%	Nein				Nein			Nein			Nein
64	2095108776	Ja	Ich habe gefühlt weniger Roadkills gemeldet.	Ja	Reduziert	76-100%		Ja	Reduziert	76-100%		Nein			Nein			Ja	zu Fuß	Fahrrad
66	684000690	Ja	Ich habe gefühlt weniger Roadkills gemeldet.	Nein				Ja	Reduziert	26-50%		Nein			Nein			Ja	zu Fuß	zu Fuß
67	1296963181	Ja	Ich habe gefühlt weniger Roadkills gemeldet.	Nein				Nein				Nein			Nein			Nein
70	1761487972	Ja	Ich habe gefühlt weniger Roadkills gemeldet.	Ja	Reduziert	76-100%		Ja	Reduziert	76-100%		Nein			Nein			Nein
71	1131481306	Ja	Ich habe gefühlt weniger Roadkills gemeldet.	Ja	Erhöht		26-50%	Ja	Erhöht		26-50%	Nein			Nein			Ja	PKW	zu Fuß
72	2147272445	Ja	Ich habe gefühlt weniger Roadkills gemeldet.	Ja	Reduziert	51-75%		Ja	Reduziert	51-75%		Nein			Nein			Nein
73	960572132	Ja	Ich habe gefühlt gleich viele Roadkills gemeldet.	Nein				Nein				Nein			Nein			Nein
77	1449983192	Ja	Ich habe gefühlt weniger Roadkills gemeldet.	Nein				Ja	Reduziert	76-100%		Nein			Nein			Nein
80	1096449870	Ja	Ich habe gefühlt weniger Roadkills gemeldet.	Ja	Reduziert	76-100%		Ja	Reduziert	76-100%		Nein			Nein			Ja	anders (z.B. öffentliche Verkehrsmittel)	zu Fuß
81	929235782	Nein	Ich habe gefühlt weniger Roadkills gemeldet.	Ja	Reduziert	76-100%		Ja	Reduziert	76-100%		Ja	landwirtschaftlich genutztes Gebiet (z.B. Felder, Äcker, Obst- bzw. Weinbaugebiete)	besiedeltes Gebiet (z.B. Dörfer, Städte)	Ja	Überlandstraßen (zwischen Gemeinden, Geschwindigkeitsbegrenzung 70-100km/h)	innerorts (im Ortsgebiet, Geschwindigkeitsbegrenzung bis 50km/h)	Ja	PKW	zu Fuß
82	831041303	Nein	Ich habe gefühlt weniger Roadkills gemeldet.	Nein				Nein				Nein			Nein			Nein
83	624723236	Ja	Ich habe gefühlt gleich viele Roadkills gemeldet.	Nein				Nein				Nein			Nein			Ja	PKW	anders (z.B. öffentliche Verkehrsmittel)
85	2048392289	Nein	Ich habe gefühlt weniger Roadkills gemeldet.	Ja	Reduziert	26-50%		Ja	Reduziert	51-75%		Ja	besiedeltes Gebiet (z.B. Dörfer, Städte)	landwirtschaftlich genutztes Gebiet (z.B. Felder, Äcker, Obst- bzw. Weinbaugebiete)	Ja	Schnellstraßen/Autobahnen (mehrspurig, Geschwindigkeitsbegrenzung >100km/h)	Überlandstraßen (zwischen Gemeinden, Geschwindigkeitsbegrenzung 70-100km/h)	Nein
86	1787490022	Ja	Ich habe gefühlt weniger Roadkills gemeldet.	Ja	Reduziert	76-100%		Ja	Reduziert	76-100%		Nein			Nein			Nein
88	362592738	Ja	Ich habe gefühlt weniger Roadkills gemeldet.	Nein				Nein				Nein			Nein			Nein
89	165783776	Ja	Ich habe gefühlt weniger Roadkills gemeldet.	Nein				Nein				Nein			Nein			Nein
90	1003130896	Nein	Ich habe gefühlt gleich viele Roadkills gemeldet.	Nein				Nein				Nein			Nein			Nein
91	900374556	Ja	Ich habe gefühlt weniger Roadkills gemeldet.	Ja	Reduziert	76-100%		Ja	Reduziert	76-100%		Nein			Nein			Nein
92	1701861913	Ja	Ich habe gefühlt weniger Roadkills gemeldet.	Ja	Reduziert	76-100%		Ja	Reduziert	76-100%		Nein			Nein			Nein
93	2028076403	Ja	Ich habe gefühlt weniger Roadkills gemeldet.	Ja	Reduziert	76-100%		Ja	Reduziert	76-100%		Ja	landwirtschaftlich genutztes Gebiet (z.B. Felder, Äcker, Obst- bzw. Weinbaugebiete)	besiedeltes Gebiet (z.B. Dörfer, Städte)	Nein			Nein
94	214052043	Nein	Ich habe gefühlt weniger Roadkills gemeldet.	Nein				Nein				Nein			Nein			Nein
95	1796498554	Nein	Ich habe gefühlt gleich viele Roadkills gemeldet.	Nein				Nein				Nein			Ja	innerorts (im Ortsgebiet, Geschwindigkeitsbegrenzung bis 50km/h)	Forststraße oder Feldweg (nicht asphaltiert, außerhalb von Ortgebieten)	Ja	PKW	zu Fuß
96	645765123	Ja	Ich habe gefühlt weniger Roadkills gemeldet.	Ja	Reduziert	26-50%		Ja	Reduziert	51-75%		Nein			Nein			Nein
97	1820236696	Ja	Ich habe gefühlt gleich viele Roadkills gemeldet.	Nein				Ja	Reduziert	0-25%		Nein			Ja	Überlandstraßen (zwischen Gemeinden, Geschwindigkeitsbegrenzung 70-100km/h)	innerorts (im Ortsgebiet, Geschwindigkeitsbegrenzung bis 50km/h)	Ja	PKW	Fahrrad
98	193916850	Ja	Ich habe gefühlt gleich viele Roadkills gemeldet.	Ja	Reduziert	76-100%		Ja	Reduziert	51-75%		Ja	forstwirtschaftlich genutztes Gebiet (z.B. Wälder)	besiedeltes Gebiet (z.B. Dörfer, Städte)	Ja	Überlandstraßen (zwischen Gemeinden, Geschwindigkeitsbegrenzung 70-100km/h)	innerorts (im Ortsgebiet, Geschwindigkeitsbegrenzung bis 50km/h)	Ja	Fahrrad	zu Fuß
99	1521880400	Ja	Ich habe gefühlt gleich viele Roadkills gemeldet.	Nein				Nein				Nein			Nein			Nein
100	971246447	Nein	Ich habe gefühlt weniger Roadkills gemeldet.	Ja	Reduziert	76-100%		Ja	Reduziert	76-100%		Ja	forstwirtschaftlich genutztes Gebiet (z.B. Wälder)	landwirtschaftlich genutztes Gebiet (z.B. Felder, Äcker, Obst- bzw. Weinbaugebiete)	Ja	Forststraße oder Feldweg (nicht asphaltiert, außerhalb von Ortgebieten)	Forststraße oder Feldweg (nicht asphaltiert, außerhalb von Ortgebieten)	Ja	zu Fuß	zu Fuß
