# Supplementary material for: A decrease in reports on road-killed animals based on citizen science during COVID-19 lockdown
Source: PeerJ. 2021 Nov 23;9:e12464. doi: 10.7717/peerj.12464 (PMC8621783; doi:10.7717/peerj.12464)
Supplement: Supplemental Information 4 [file peerj-09-12464-s004.xlsx]

## Sheet: Tabelle1
Response_ID	Random start value	duration	number_rk	length_change	length_red_inc	howmuchlength_red	howmuchlength_inc	frequ_change	frequ_red_inc	howmuchfrequ_red	howmuchfrequ_inc	routechange	route_from	route_to	roadchange	road_from	road_to	transportchange	transport_from	transport_to
3	7135390	Yes	I had the feeling that I had reported fewer roadkills.	Yes	Reduced	76-100%		Yes	Reduced	76-100%		No			Yes	Interurban roads (between municipalities, speed limit 70-100km/h)	Forest road or field path (not paved, outside settlements)	Yes	car	on foot
4	7792	Yes	I had the feeling that I had reported fewer roadkills.	No				No				No			No			No
5	4301191	Yes	I had the feeling that I had reported fewer roadkills.	Yes	Reduced	51-75%		Yes	Reduced	26-50%		Yes	Settled area (e.g. villages, towns)	Agriculturally used area (e.g. fields, arable land, orchards or vineyards)	No			No
6	499387	Yes	I had the feeling that I had reported fewer roadkills.	Yes	Reduced	76-100%		Yes	Reduced	76-100%		Yes	Settled area (e.g. villages, towns)	Agriculturally used area (e.g. fields, arable land, orchards or vineyards)	Yes	Interurban roads (between municipalities, speed limit 70-100km/h)	inner-city (in the local area, speed limit up to 50km/h)	Yes	car	on foot
7	5653572	Yes	I had the feeling that I had reported fewer roadkills.	Yes	Reduced	51-75%		Yes	Reduced	51-75%		No			No			No
8	6861693	Yes	I had the feeling I had reported the same number of roadkills.	No				No				No			No			No
9	7347747	Yes	I had the feeling that I had reported fewer roadkills.	Yes	Reduced	26-50%		Yes	Reduced	26-50%		No			No			No
10	6153656	Yes	I had the feeling that I had reported more roadkills.	No				Yes	Increased		76-100%	No			No			No
11	8725041	Yes	I had the feeling I had reported the same number of roadkills.	Yes	Increased		mehr als 100%	Yes	Reduced	26-50%		No			Yes	inner-city (in the local area, speed limit up to 50km/h)	Forest road or field path (not paved, outside settlements)	Yes	other (e.g. public transport)	on foot
12	5164239	No	I had the feeling that I had reported fewer roadkills.	Yes	Reduced	0-25%		Yes	Reduced	0-25%		No			No			No
14	2737630	Yes	I had the feeling that I had reported fewer roadkills.	No				Yes	Reduced	76-100%		No			No			Yes	Bicycle	car
15	4749941	Yes	I had the feeling that I had reported fewer roadkills.	Yes	Reduced	0-25%		Yes	Reduced	76-100%		No			No			Yes	other (e.g. public transport)	car
16	5536818	Yes	I had the feeling that I had reported fewer roadkills.	Yes	Reduced	51-75%		Yes	Reduced	51-75%		Yes	Agriculturally used area (e.g. fields, arable land, orchards or vineyards)	Settled area (e.g. villages, towns)	No			No
17	3434266	Yes	I had the feeling that I had reported fewer roadkills.	Yes	Reduced	76-100%		Yes	Reduced	76-100%		Yes	Settled area (e.g. villages, towns)	Agriculturally used area (e.g. fields, arable land, orchards or vineyards)	Yes	Expressways/motorways (multi-lane, speed limit >100km/h)	Forest road or field path (not paved, outside settlements)	Yes	car	on foot
19	2501591	Yes	I had the feeling I had reported the same number of roadkills.	No				No				No			No			No
20	825322	Yes	I had the feeling that I had reported fewer roadkills.	No				No				No			No			No
21	6621836	Yes	I had the feeling that I had reported more roadkills.	Yes	Increased		26-50%	Yes	Increased		26-50%	No			No			No
22	633217	No	I had the feeling I had reported the same number of roadkills.	Yes	Reduced	0-25%		Yes	Reduced	0-25%		Yes	Settled area (e.g. villages, towns)	Agriculturally used area (e.g. fields, arable land, orchards or vineyards)	Yes	inner-city (in the local area, speed limit up to 50km/h)	Expressways/motorways (multi-lane, speed limit >100km/h)	Yes	on foot	car
23	3300576	Yes	I had the feeling I had reported the same number of roadkills.	Yes	Reduced	26-50%		Yes	Reduced	26-50%		Yes	Agriculturally used area (e.g. fields, arable land, orchards or vineyards)	Settled area (e.g. villages, towns)	Yes	Forest road or field path (not paved, outside settlements)	inner-city (in the local area, speed limit up to 50km/h)	No
24	4603228	Yes	I had the feeling that I had reported fewer roadkills.	No				No				No			No			No
25	3114413	No	I had the feeling I had reported the same number of roadkills.	No				Yes	Reduced	51-75%		No			No			No
26	1762383	Yes	I had the feeling that I had reported fewer roadkills.	Yes	Reduced	26-50%		Yes	Reduced	51-75%		Yes	Agriculturally used area (e.g. fields, arable land, orchards or vineyards)	Settled area (e.g. villages, towns)	No			No
27	9468674	Yes	I had the feeling that I had reported fewer roadkills.	Yes	Reduced	51-75%		Yes	Reduced	26-50%		No			No			No
28	2056223	No	I had the feeling that I had reported more roadkills.	No				Yes	Increased		51-75%	No			No			No
29	1875094	Yes	I had the feeling I had reported the same number of roadkills.	No				Yes	Reduced	51-75%		No			No			No
30	3206801	Yes	I had the feeling that I had reported fewer roadkills.	Yes	Reduced	76-100%		Yes	Reduced	76-100%		No			No			No
31	408721	Yes	I had the feeling I had reported the same number of roadkills.	Yes	Reduced	76-100%		Yes	Reduced	76-100%		No			No			Yes	other (e.g. public transport)	car
32	2423203	Yes	I had the feeling that I had reported fewer roadkills.	Yes	Reduced	26-50%		Yes	Reduced	26-50%		Yes	Agriculturally used area (e.g. fields, arable land, orchards or vineyards)	Settled area (e.g. villages, towns)	Yes	Expressways/motorways (multi-lane, speed limit >100km/h)	inner-city (in the local area, speed limit up to 50km/h)	Yes	car	on foot
34	7179658	Yes	I had the feeling that I had reported fewer roadkills.	Yes	Reduced	76-100%		Yes	Reduced	76-100%		Yes	Settled area (e.g. villages, towns)	Area used for forestry (e.g. forests)	Yes	inner-city (in the local area, speed limit up to 50km/h)	Forest road or field path (not paved, outside settlements)	Yes	other (e.g. public transport)	on foot
35	3228729	Yes	I had the feeling that I had reported fewer roadkills.	No				Yes	Reduced	26-50%		No			No			No
36	4604670	Yes	I had the feeling that I had reported fewer roadkills.	No				No				No			No			No
38	2871823	Yes	I had the feeling that I had reported fewer roadkills.	No				Yes	Reduced	26-50%		No			No			No
39	4347613	Yes	I had the feeling that I had reported fewer roadkills.	No				No				Yes	Area used for forestry (e.g. forests)	Agriculturally used area (e.g. fields, arable land, orchards or vineyards)	No			No
42	3482971	Yes	I had the feeling I had reported the same number of roadkills.	Yes	Reduced	76-100%		Yes	Reduced	76-100%		Yes	Settled area (e.g. villages, towns)	Agriculturally used area (e.g. fields, arable land, orchards or vineyards)	Yes	Interurban roads (between municipalities, speed limit 70-100km/h)	Forest road or field path (not paved, outside settlements)	Yes	car	Bicycle
43	9704396	No	I had the feeling that I had reported fewer roadkills.	No				No				No			No			No
44	8073068	No	I had the feeling that I had reported fewer roadkills.	No				Yes	Reduced	26-50%		No			No			No
47	6451329	No	I had the feeling that I had reported fewer roadkills.	Yes	Reduced	76-100%		Yes	Reduced	76-100%		Yes	Settled area (e.g. villages, towns)	Area used for forestry (e.g. forests)	No			No
49	6131974	No	I had the feeling I had reported the same number of roadkills.	Yes	Reduced	51-75%		Yes	Reduced	51-75%		Yes	Agriculturally used area (e.g. fields, arable land, orchards or vineyards)	Settled area (e.g. villages, towns)	Yes	Interurban roads (between municipalities, speed limit 70-100km/h)	inner-city (in the local area, speed limit up to 50km/h)	Yes	car	Bicycle
52	6749807	No	I had the feeling that I had reported fewer roadkills.	Yes	Reduced	76-100%		Yes	Reduced	76-100%		Yes	Agriculturally used area (e.g. fields, arable land, orchards or vineyards)	Settled area (e.g. villages, towns)	Yes	Interurban roads (between municipalities, speed limit 70-100km/h)	inner-city (in the local area, speed limit up to 50km/h)	Yes	Bicycle	on foot
53	9348562	No	I had the feeling I had reported the same number of roadkills.	No				No				No			No			No
54	6493390	Yes	I had the feeling I had reported the same number of roadkills.	Yes	Reduced	76-100%		Yes	Reduced	76-100%		No			No			No
55	4421264	Yes	I had the feeling that I had reported fewer roadkills.	No				No				No			No			No
56	2626150	No	I had the feeling I had reported the same number of roadkills.	Yes	Reduced	51-75%		Yes	Reduced	51-75%		No			No			Yes	on foot	Bicycle
57	9866960	Yes	I had the feeling that I had reported fewer roadkills.	No				No				No			No			No
58	1456350	Yes	I had the feeling I had reported the same number of roadkills.	No				Yes	Increased		51-75%	No			Yes	Expressways/motorways (multi-lane, speed limit >100km/h)	Interurban roads (between municipalities, speed limit 70-100km/h)	Yes	car	on foot
59	2099806845	Yes	I had the feeling I had reported the same number of roadkills.	No				No				No			No			No
60	993603403	Yes	I had the feeling I had reported the same number of roadkills.	Yes	Increased		0-25%	Yes	Increased		0-25%	No			No			No
61	1406878745	Yes	I had the feeling that I had reported fewer roadkills.	Yes	Reduced	51-75%		Yes	Reduced	76-100%		No			No			No
62	1647992404	Yes	I had the feeling I had reported the same number of roadkills.	No				No				No			No			No
63	2043067186	No	I had the feeling I had reported the same number of roadkills.	Yes	Increased		26-50%	No				No			No			No
64	2095108776	Yes	I had the feeling that I had reported fewer roadkills.	Yes	Reduced	76-100%		Yes	Reduced	76-100%		No			No			Yes	on foot	Bicycle
66	684000690	Yes	I had the feeling that I had reported fewer roadkills.	No				Yes	Reduced	26-50%		No			No			Yes	on foot	on foot
67	1296963181	Yes	I had the feeling that I had reported fewer roadkills.	No				No				No			No			No
70	1761487972	Yes	I had the feeling that I had reported fewer roadkills.	Yes	Reduced	76-100%		Yes	Reduced	76-100%		No			No			No
71	1131481306	Yes	I had the feeling that I had reported fewer roadkills.	Yes	Increased		26-50%	Yes	Increased		26-50%	No			No			Yes	car	on foot
72	2147272445	Yes	I had the feeling that I had reported fewer roadkills.	Yes	Reduced	51-75%		Yes	Reduced	51-75%		No			No			No
73	960572132	Yes	I had the feeling I had reported the same number of roadkills.	No				No				No			No			No
77	1449983192	Yes	I had the feeling that I had reported fewer roadkills.	No				Yes	Reduced	76-100%		No			No			No
80	1096449870	Yes	I had the feeling that I had reported fewer roadkills.	Yes	Reduced	76-100%		Yes	Reduced	76-100%		No			No			Yes	other (e.g. public transport)	on foot
81	929235782	No	I had the feeling that I had reported fewer roadkills.	Yes	Reduced	76-100%		Yes	Reduced	76-100%		Yes	Agriculturally used area (e.g. fields, arable land, orchards or vineyards)	Settled area (e.g. villages, towns)	Yes	Interurban roads (between municipalities, speed limit 70-100km/h)	inner-city (in the local area, speed limit up to 50km/h)	Yes	car	on foot
82	831041303	No	I had the feeling that I had reported fewer roadkills.	No				No				No			No			No
83	624723236	Yes	I had the feeling I had reported the same number of roadkills.	No				No				No			No			Yes	car	other (e.g. public transport)
85	2048392289	No	I had the feeling that I had reported fewer roadkills.	Yes	Reduced	26-50%		Yes	Reduced	51-75%		Yes	Settled area (e.g. villages, towns)	Agriculturally used area (e.g. fields, arable land, orchards or vineyards)	Yes	Expressways/motorways (multi-lane, speed limit >100km/h)	Interurban roads (between municipalities, speed limit 70-100km/h)	No
86	1787490022	Yes	I had the feeling that I had reported fewer roadkills.	Yes	Reduced	76-100%		Yes	Reduced	76-100%		No			No			No
88	362592738	Yes	I had the feeling that I had reported fewer roadkills.	No				No				No			No			No
89	165783776	Yes	I had the feeling that I had reported fewer roadkills.	No				No				No			No			No
90	1003130896	No	I had the feeling I had reported the same number of roadkills.	No				No				No			No			No
91	900374556	Yes	I had the feeling that I had reported fewer roadkills.	Yes	Reduced	76-100%		Yes	Reduced	76-100%		No			No			No
92	1701861913	Yes	I had the feeling that I had reported fewer roadkills.	Yes	Reduced	76-100%		Yes	Reduced	76-100%		No			No			No
93	2028076403	Yes	I had the feeling that I had reported fewer roadkills.	Yes	Reduced	76-100%		Yes	Reduced	76-100%		Yes	Agriculturally used area (e.g. fields, arable land, orchards or vineyards)	Settled area (e.g. villages, towns)	No			No
94	214052043	No	I had the feeling that I had reported fewer roadkills.	No				No				No			No			No
95	1796498554	No	I had the feeling I had reported the same number of roadkills.	No				No				No			Yes	inner-city (in the local area, speed limit up to 50km/h)	Forest road or field path (not paved, outside settlements)	Yes	car	on foot
96	645765123	Yes	I had the feeling that I had reported fewer roadkills.	Yes	Reduced	26-50%		Yes	Reduced	51-75%		No			No			No
97	1820236696	Yes	I had the feeling I had reported the same number of roadkills.	No				Yes	Reduced	0-25%		No			Yes	Interurban roads (between municipalities, speed limit 70-100km/h)	inner-city (in the local area, speed limit up to 50km/h)	Yes	car	Bicycle
98	193916850	Yes	I had the feeling I had reported the same number of roadkills.	Yes	Reduced	76-100%		Yes	Reduced	51-75%		Yes	Area used for forestry (e.g. forests)	Settled area (e.g. villages, towns)	Yes	Interurban roads (between municipalities, speed limit 70-100km/h)	inner-city (in the local area, speed limit up to 50km/h)	Yes	Bicycle	on foot
99	1521880400	Yes	I had the feeling I had reported the same number of roadkills.	No				No				No			No			No
100	971246447	No	I had the feeling that I had reported fewer roadkills.	Yes	Reduced	76-100%		Yes	Reduced	76-100%		Yes	Area used for forestry (e.g. forests)	Agriculturally used area (e.g. fields, arable land, orchards or vineyards)	Yes	Forest road or field path (not paved, outside settlements)	Forest road or field path (not paved, outside settlements)	Yes	on foot	on foot
